# Supplementary material for: Machine Learning Models for Predicting Mortality in 7472 Very Low Birth Weight Infants Using Data from a Nationwide Neonatal Network
Source: MDPI journal article supplement (doi:10.3390/diagnostics12030625), 2022-03-03
Supplement: s1 [file s1]

**Supplementary Table S1B.** Paternal social history between the Alive and the Death groups

| Characteristics                     | Alive (n=8127) | Death (n=1207) | <i>P</i> -value    |
|-------------------------------------|----------------|----------------|--------------------|
| <b>Social History</b>               |                |                |                    |
| Education, graduation, <i>n</i> (%) |                |                | 0.395 <sup>1</sup> |
| Elementary school                   | 6 (0.1)        | 0              |                    |
| Middle school                       | 44 (1.0)       | 3 (0.5)        |                    |
| High school                         | 1009 (21.9)    | 147 (23.6)     |                    |
| College or above                    | 3555 (77.0)    | 474 (76.0)     |                    |
| Nationality, <i>n</i> (%)           |                |                | 0.875 <sup>1</sup> |
| South Korea                         | 7957 (98.8)    | 1172 (98.8)    |                    |
| China                               | 64 (0.8)       | 8 (0.7)        |                    |
| Japan                               | 4 (0.1)        | 1 (0.1)        |                    |
| America                             | 15 (0.2)       | 3 (0.3)        |                    |
| Canada                              | 1 (0)          | 0              |                    |
| Australia                           | 4 (0.1)        | 2 (0.2)        |                    |
| England                             | 2 (0)          | 0              |                    |
| Pakistan                            | 2 (0)          | 0              |                    |
| Germany                             | 1 (0)          | 0              |                    |

<sup>1</sup>Chi-squared test; <sup>2</sup>Student's t-test; *P* < 0.05 is shown in bold.
