# Supplementary material for: Machine Learning Models for Predicting Mortality in 7472 Very Low Birth Weight Infants Using Data from a Nationwide Neonatal Network
Source: MDPI journal article supplement (doi:10.3390/diagnostics12030625), 2022-03-03
Supplement: s1 [file s1]

**Supplementary Table S1A.** Maternal social history of the Alive and the Death groups

| Characteristics                     | Alive (n=8127) | Death (n=1207) | <i>P</i> -value          |
|-------------------------------------|----------------|----------------|--------------------------|
| <b>Social History</b>               |                |                |                          |
| Education, graduation, <i>n</i> (%) |                |                | <b>0.008<sup>1</sup></b> |
| College or above                    | 4688 (74.4)    | 671 (71.8)     |                          |
| High school                         | 1504 (23.9)    | 235 (25.1)     |                          |
| Middle school                       | 82 (1.3)       | 25 (2.7)       |                          |
| Elementary school                   | 23 (0.4)       | 4 (0.4)        |                          |
| Marital status                      |                |                | 0.136 <sup>1</sup>       |
| Married                             | 7967 (98.0)    | 1171 (97.0)    |                          |
| Divorced                            | 7 (0.1)        | 1 (0.1)        |                          |
| Single                              | 68 (0.8)       | 15 (1.2)       |                          |
| Single living together              | 85 (1.0)       | 20 (1.7)       |                          |
| Nationality, <i>n</i> (%)           |                |                | 0.140 <sup>1</sup>       |
| South Korea                         | 7819 (96.7)    | 1152 (96.2)    |                          |
| Vietnam                             | 91 (1.1)       | 24 (2.0)       |                          |
| China                               | 99 (1.2)       | 11 (0.9)       |                          |
| Philippines                         | 25 (0.3)       | 6 (0.5)        |                          |
| Japan                               | 11 (0.1)       | 0              |                          |
| Cambodia                            | 17 (0.2)       | 1 (0.1)        |                          |
| America                             | 6 (0.1)        | 2 (0.2)        |                          |
| Thailand                            | 5 (0.1)        | 1 (0.1)        |                          |
| Mongolia                            | 10 (0.1)       | 1 (0.1)        |                          |

<sup>1</sup>Chi-squared test; <sup>2</sup>Student's t-test; *P* < 0.05 is shown in bold.
