# Supplementary material for: Machine Learning Models for Predicting Mortality in 7472 Very Low Birth Weight Infants Using Data from a Nationwide Neonatal Network
Source: MDPI journal article supplement (doi:10.3390/diagnostics12030625), 2022-03-03
Supplement: s1 [file s1]

**Supplementary Table S2.** Comparison of variables between KNN registry and this study

| Variables of KNN registry      | Variables of this study |
|--------------------------------|-------------------------|
| <b>Neonatal factors</b>        | <b>Neonatal factors</b> |
| Male sex                       | Male sex                |
| Gestational age                | Gestational age         |
| Body weight                    | .                       |
| 1 min Apgar scores             | .                       |
| 5 min Apgar scores             | 5 min Apgar scores      |
| Body temperature               | Body temperature        |
| Multiple births                | .                       |
| Resuscitation at birth         | Resuscitation at birth  |
| <b>Maternal factors</b>        | <b>Maternal factors</b> |
| Age, year                      | .                       |
| Diabetes mellitus              | Diabetes mellitus       |
| Hypertension                   | Hypertension            |
| Chorioamnionitis               | Chorioamnionitis        |
| PROM                           | PROM                    |
| Antenatal steroid              | Antenatal steroid       |
| Cesarean delivery              | Cesarean delivery       |
| <b>Maternal social history</b> |                         |
| Education                      |                         |
| Marital status                 |                         |
| Nationality                    |                         |
| <b>Paternal social history</b> |                         |
| Education                      |                         |
| Ethnicity                      |                         |

PROM = premature rupture of membranes
