# Supplementary material for: Machine Learning Models for Predicting Mortality in 7472 Very Low Birth Weight Infants Using Data from a Nationwide Neonatal Network
Source: MDPI journal article supplement (doi:10.3390/diagnostics12030625), 2022-03-03
Supplement: s1 [file s1]

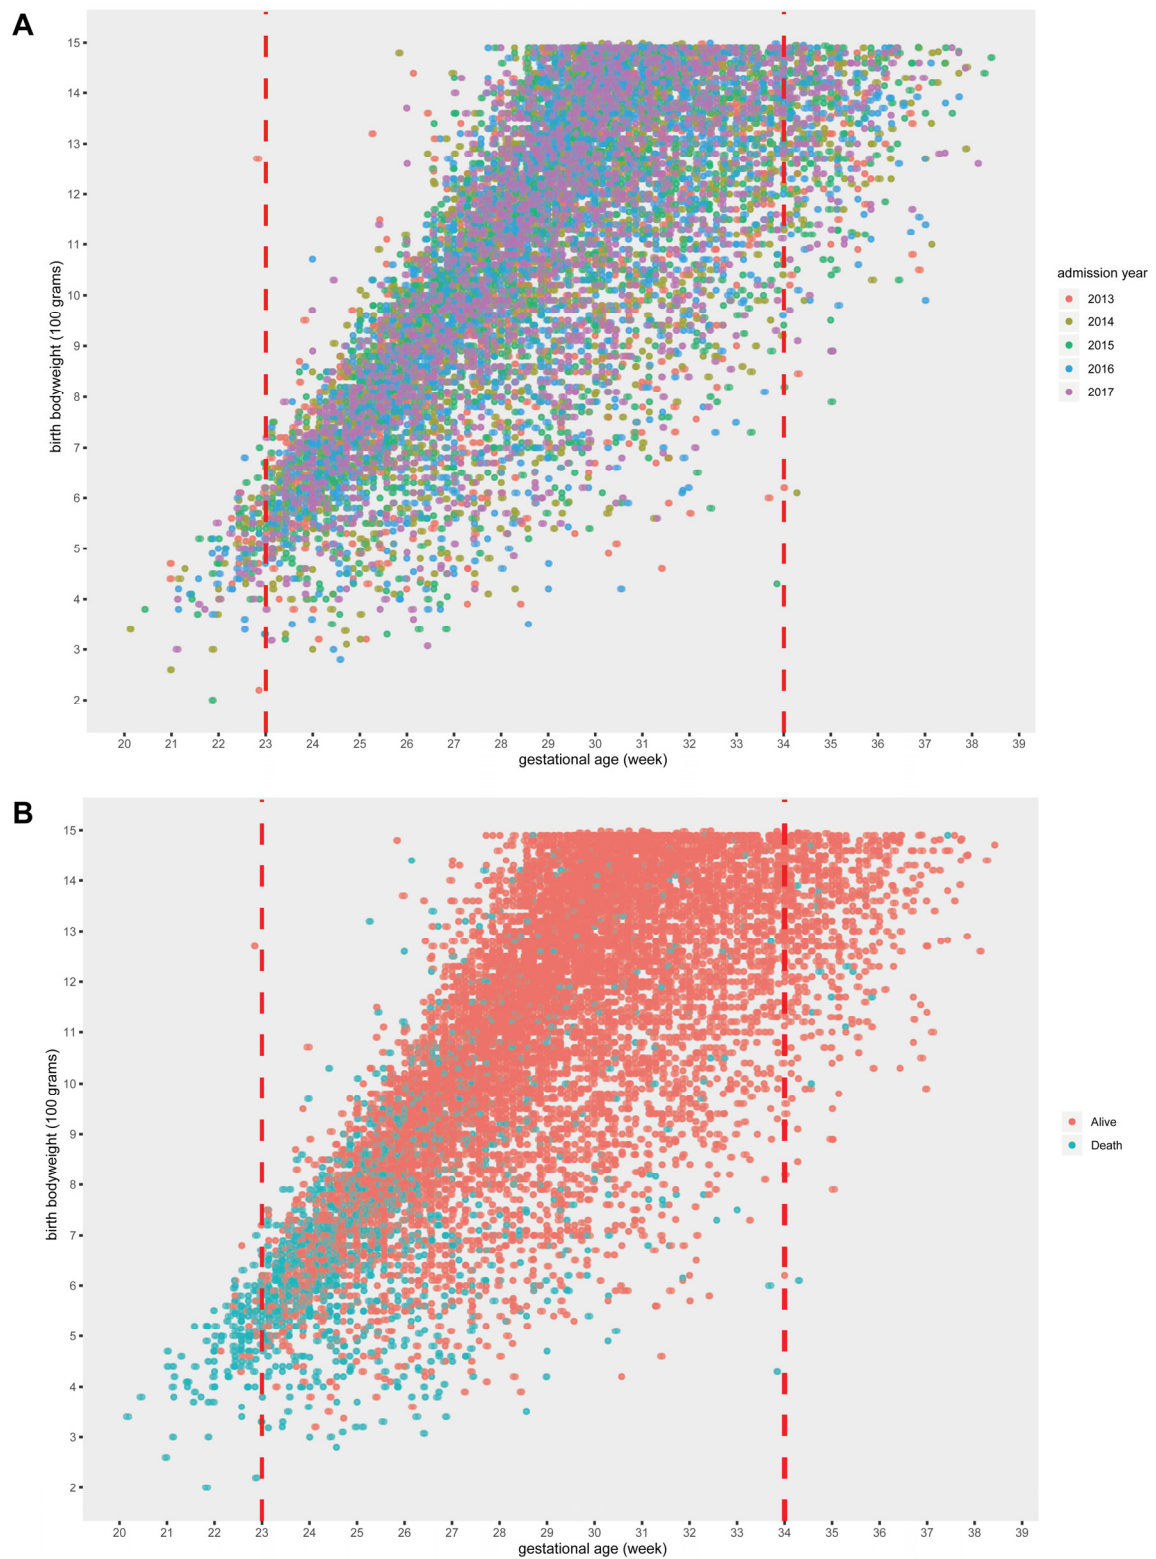

**Figure S1.** (A) Scatter plots between gestational age and body weight at birth (100 g) for each admission year between 2013 to 2017, (B) Scatter plots between gestational age and a body weight at birth (100 g) based on each alive/death infant.

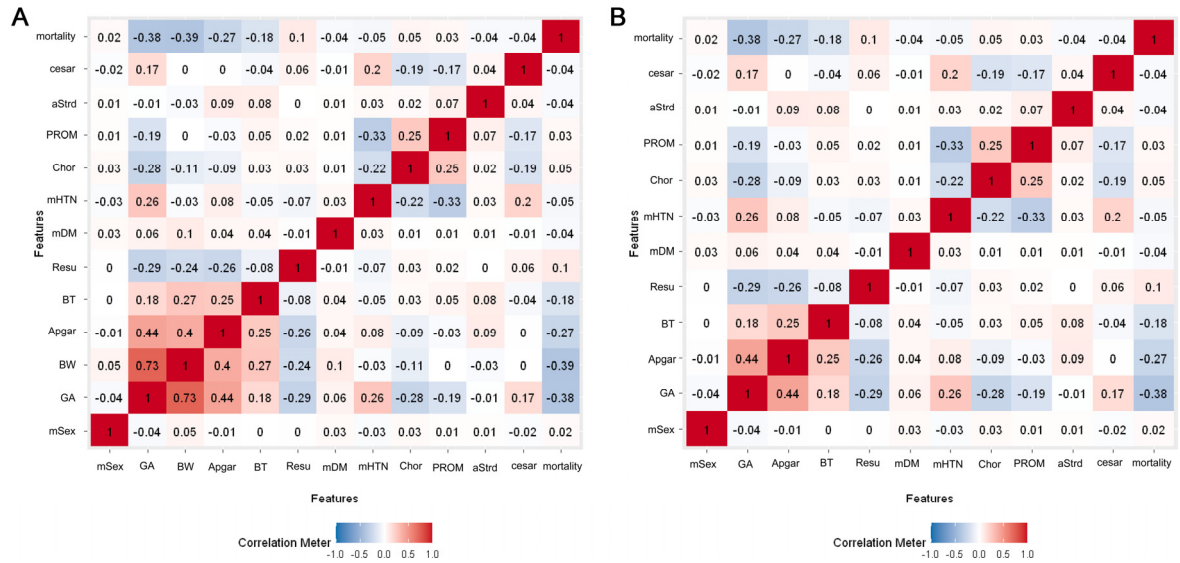

**Figure S2. (A)** The correlation heatmap between features of this study and mortality. mSex = male sex; GA = gestational age; BW = body weight; Apgar = 5 min Apgar score; BT = body temperature; Resu = resuscitation; mDM = maternal diabetes mellitus; mHTN = maternal hypertension; Chor = chorioamnionitis; PROM = premature rupture of membranes; aStrd = antenatal steroid; cesar = cesarean delivery, **(B)** Correlation heatmap between features of this study and mortality. mSex = male sex; GA = gestational age; Apgar = 5 min Apgar score; BT = body temperature; Resu = resuscitation; mDM = maternal diabetes mellitus; mHTN = maternal hypertension; Chor = chorioamnionitis; PROM = premature rupture of membranes; aStrd = antenatal steroid; cesar = cesarean delivery.
