# Supplementary material for: Machine Learning Models for Predicting Mortality in 7472 Very Low Birth Weight Infants Using Data from a Nationwide Neonatal Network
Source: Diagnostics (Basel). 2022 Mar 3;12(3):625. doi: 10.3390/diagnostics12030625 (PMC8947011; doi:10.3390/diagnostics12030625)
Supplement: Supplementary file 1 [file diagnostics-12-00625-s001.zip]

Archive with 4 entries (4 files):
- Supplementary Figures S1 and S2.pdf
- SupplementaryT_1A.pdf
- SupplementaryT_1B.pdf
- SupplementaryT_2.pdf
